1 **Title:** *A probabilistic model to identify the core microbial community*

2

3 **Running header:** *Identifying the probable core microbial community*

4

5 **Authors:** <sup>1\*</sup>Thiago Gumiere, <sup>2</sup>Kyle M. Meyer, <sup>2</sup>Adam R. Burns, <sup>3</sup>Silvio J. Gumiere,  
6 <sup>2</sup>Brendan J. M. Bohannon, <sup>1</sup>Fernando D. Andreote

7

8 <sup>1</sup>Department of Soil Science, "Luiz de Queiroz" College of Agriculture, University of São Paulo.

9 Av. Pádua Dias, 11 – Piracicaba, São Paulo, Brazil 13418-900.

10 <sup>2</sup>Institute of Ecology and Evolution, University of Oregon, Eugene, Oregon, United States of

11 America 97403-5789.

12 <sup>3</sup> Department of Soil and Agricultural Engineering, 2480 Hochelaga Boulevard, Laval

13 University, Quebec City, QC, Canada, G1V 0A6.

14

15 **\*Corresponding author:** Thiago Gumiere, Department of Soil Science, "Luiz de Queiroz"

16 College of Agriculture, University of São Paulo, Av Pádua Dias, 11, Piracicaba, SP, Brazil.

17 13418-900. Phone: +55 19 3417-2123, E-mail: [thiago.gumiere@gmail.com](mailto:thiago.gumiere@gmail.com)

18

19 **Conflict of Interest statement:** The authors declare no conflict of interest.

20

21

22

23

24

25

26

27 ***Originality-Significance Statement***

28 More rigorous and less arbitrary statistical methods could increase knowledge  
29 regarding the role of microorganisms and their interactions. Here, we suggest a  
30 probabilistic method to identify the microbial core community across systems. Our  
31 method identifies a large proportion of the rare community that likely belongs to the  
32 microbial core community, which was not identified by conventional methods. Our  
33 probabilistic model is a non-arbitrary approach to defining the microbial core  
34 community, which may help in the next step of the microbial core community studies.

35

36 **ABSTRACT**

37 The core microbial community has been hypothesized to have essential functions  
38 ranging from maintaining health in animals to protection against plant disease.  
39 However, the identification of the core microbial community is frequently based on  
40 arbitrary thresholds, selecting only the most abundant microorganisms. Here, we  
41 developed and tested an approach to identify the core community based on a  
42 probabilistic model. The Poisson distribution was used to identify OTUs with a  
43 probable occurrence in every sample of a given dataset. We identified the core  
44 communities of four extensive microbial datasets, and compared the results with  
45 conventional, but arbitrary, methods. The datasets were composed of the microbiomes  
46 of humans (tongue, gut, and skin), mice (gut), plant (grapevine) tissue, and the maize  
47 rhizosphere. Our proposed method revealed core microbial communities with higher  
48 richness and diversity than those previously described. This method also includes a  
49 greater number of rare taxa in the core, which are often neglected by arbitrary threshold  
50 methods. We demonstrated that our proposed method reveals a probable core microbial  
51 community for each different habitat, which extend our knowledge about shared  
52 microbial communities. Our proposed method may help the next steps proving the  
53 essential functions of core microbial communities.

54

## 55 INTRODUCTION

56 The composition of microbial communities can vary greatly even over fine spatial  
57 and temporal scales, making it difficult to identify the drivers of community dynamics  
58 and the link between composition and function. To overcome the obfuscating effects of  
59 this variation, researchers often limit their focus to the ‘core’ community, which is  
60 defined as organisms that are ubiquitous in a given habitat, despite environmental  
61 fluctuation (Hamady and Knight, 2009). In microbial ecology, the core community  
62 refers to microbial taxa (Shade and Handelsman, 2012), or genes (Turnbaugh *et al.*,  
63 2007), shared across a set of samples in a given ecosystem.

64 There are considerable attempts to identify the core community across different  
65 hosts including corals (Ainsworth *et al.*, 2015), zebrafish (Roeselers *et al.*, 2011), mice  
66 (Pédron *et al.*, 2012), ruminants (Henderson *et al.*, 2015), *Arabidopsis thaliana*  
67 (Lundberg *et al.*, 2012) and sugarcane plants (Yeoh *et al.*, 2015). It has been suggested  
68 that the core microbial community could play essential roles in ecosystem functioning,  
69 and may also be useful as indicators of system perturbation (Shade and Handelsman,  
70 2012; Saunders *et al.*, 2015). For example, an abundant microbial core was identified  
71 across 210 human adult fecal samples, varying substantially in geographic origin, ethnic  
72 background and diet (Sekelja *et al.*, 2011). The authors suggested that this core has an  
73 important role in gut homeostasis and health. Other studies have suggested roles for the  
74 core in plant growth promotion and the maintenance of plant health (Schlaeppli *et al.*,  
75 2014). However, few studies have been successful in directly linking the core microbial  
76 community to important community or ecosystem functions.

77 The lack of evidences for the importance of the core community may be due to  
78 how the core is identified. Since the core is defined to be ubiquitous in a habitat, it is  
79 assumed that the microbial taxa or genes belonging to the core should be found in every  
80 sample collected from a given habitat. The core microbial community is identified by

81 identifying shared microorganisms or genes across a collection of samples (*discussed by*  
82 Shade and Handelsman, 2012). In this approach, the core is represented by taxa found in  
83 every sample analyzed (100% frequency across samples). However, to date no  
84 methodological approach has fully assessed the microbial diversity of any  
85 environmental sample (Kanagawa, 2003; Feinstein *et al.*, 2009; Prosser, 2015). Current  
86 sequencing methods used to survey complex microbial communities tend to target the  
87 most abundant groups of microorganisms (Caporaso *et al.*, 2011). Consequently, the  
88 rare component of the core microbial community is missed in these studies. The most  
89 commonly used approach to circumvent this problem is the definition of cutoffs for the  
90 frequency of microbes or genes to be classified as a member of the core microbial. For  
91 instance, researchers have used cutoff values ranging from 30% to 99% frequency  
92 across samples (Li *et al.*, 2013; Ainsworth *et al.*, 2015) to define the core community in  
93 environmental samples. However, these cutoffs still do not include rare taxa and also  
94 could result in false assignments to the core, thus influencing inferences about its  
95 function and composition.

96       Given the numerous difficulties associated with sampling and fully sequencing  
97 microbial communities, one solution to identify core community members is to use a  
98 probabilistic model to assign members of the microbial community to the core  
99 community. Here, we develop and test an approach to identifying the core community  
100 based on the Poisson distribution. Given the occurrence distribution of an event, *i.e.* a  
101 microorganism, in a group of samples, this model estimates the probability of this event  
102 in a group of samples (Rao and Rubin, 1964). Among discrete probability models, we  
103 selected the Poisson distribution because it is particularly suitable for large count  
104 datasets, *e.g.* a high number of events, and the occurrence of small or rare probabilities  
105 (Karlis, 2003), situations common when using microbial datasets to estimate a core

106 community. Unlike other attempts to define the core community (e.g. Turnbaugh *et al.*,  
107 2009) there is no abundance threshold in our proposed method, which allows inclusion  
108 of rare taxa as possible members of the core microbial community.

109 We tested our proposed method using several previously published datasets, and  
110 compared our results to those obtained using conventional (i.e. arbitrary threshold)  
111 approaches. These datasets included human, mice, plant (grapevine tissue and maize  
112 rhizosphere), and soil data, and were obtained from the Earth Microbiome Project  
113 (EMP; <http://www.earthmicrobiome.org>). We hypothesized that our approach would  
114 lead to the identification of a probable core community that would be a higher  
115 proportion of the microbial community, and would also be composed of more  
116 microorganisms with low abundances (rare community members), than the core  
117 community identified using conventional approaches.

## 118 **RESULTS AND DISCUSSION**

### 119 *Testing the distribution models and rarefaction effect*

120 The first step was to select the most appropriate probabilistic method that fitted  
121 in OTU distributions. We tested 13 different models (described in Supplementary  
122 Material), and in Figure S1, we can observe the fourth best distribution models  
123 (Poisson, Chi-squared, Gamma and Beta) fitted on each dataset (Human, Grape, Maize  
124 and Mice). The Poisson distribution showed the higher and significant fit on OTU  
125 distribution, which is indicated by  $R^2$  and  $p$ -value  $< 0.05$  in Table S1. We also observed  
126 that the Poisson distribution indicated lesser value of RMSE. Models based on  
127 ‘Poissonization’ arguments has also been indicated as good predictor of microbial  
128 unknown (Lladser *et al.*, 2011).

129 The use of rarefaction, normalization method which equalizes the number of  
130 sequences (or reads) per sample, is discussed in the literature. According to McMurdie

131 and Holmes (2014), the rarefaction increases the number of false positives species, and  
132 also with different abundance across sample classes. However, other simulation studies  
133 indicated that the rarefaction is better than other normalization methods, clustering  
134 samples as biological origin (Weiss *et al.*, 2017). As probability models requires the  
135 normalization, we evaluated the effect of the rarefaction on our proposed.

136 It can be observed in Figures S2, S3, S4 and S5 that the rarefaction method  
137 affects the line of Poisson distribution identification. We also observed that the values  
138 of  $R^2$  decreases with the increase of rarefication levels. However, the number of OTU's  
139 identified as probable members of the core microbial community did not present a  
140 significant variation in general (Table S2). In grape dataset only the two highest  
141 rarefication levels, and in maize and human dataset only the lesser rarefication level  
142 showed a significant different number of core OTU's identified. As indicated in Figures  
143 S6, S7, S8 and S9, the taxonomic composition at the phyla level was not significant  
144 affect by the most of rarefication levels. We verified the similarity of core community  
145 composition by different rarefication levels using NMDS analyses (Jaccard similarity).  
146 In Figure S10, we can observe that only the lowest level of rarefication for the grape  
147 (Core\_500), maize (Core\_100), and human (core\_100) datasets showed a significant  
148 difference from the other rarefication levels. For the mice dataset, we observe the lower  
149 variation than the other datasets, but with the same pattern (lowest rarefication level is  
150 not grouped). Considering this normalization effect, we decided to maintain the same  
151 method (rarefication level) used by the authors of each published datasets for the next  
152 steps.

### 153 ***A probabilistic method to identify the core microbial community***

154 Using this probabilistic model, we identified core microbial communities for each  
155 dataset selected for analysis with  $R^2$  varying between 0.46 (mice) and 0.91 (grape), and

156 with *p-values* as lower than 0.05. The obtained curves indicated the occurrence of OTUs  
157 with distinct values of frequency occurrence as components of the core microbial  
158 communities, which is not observed when other approaches are used (Figure 1 and  
159 Supplementary Figures S11, S12, and S13). As the results were based on a probabilistic  
160 method, we expected that our proposed method would identify a group closer to the real  
161 core community than the group identified by conventional methods.

162 We observed that our probabilistic method reveals a rich and diverse group of  
163 microorganism which has not been identified by conventional methods, but belong to  
164 the probable core microbial community. For example, the core microbial community  
165 identified in the mice database is composed of 170 OTUs using an arbitrary threshold of  
166 30% detection frequency, and 1,717 OTUs using the method based on the Poisson  
167 distribution (Table 2). In particular, these differences were found for the occurrence of  
168 OTUs with low abundance, much more pronounced in the core community obtained by  
169 the method based on the Poisson distribution (e.g. Figure 1).

170 In the literature, the microorganisms with low abundance are frequently referred  
171 to as the “rare biosphere” (Sogin *et al.*, 2006). The rare biosphere was first described as  
172 microorganisms with low growth rates, which could act as a “seed bank” of species or  
173 genes important in maintaining the functional redundancy of a system (Pedrós-Alió,  
174 2006). These taxa could become dominant (in high abundance) under certain conditions  
175 (Shade *et al.*, 2014). Following this view, members of the rare community can be  
176 classified as conditionally rare taxa (CRT), suggested to be ubiquitous in some systems  
177 (Shade and Gilbert, 2015). As members of a core microbial community, the CRT could  
178 be important to the stability and functional resilience of a system. Using our  
179 methodology, these groups could be properly classified within the core community,  
180 while the arbitrarily defined core rarely included these putative CRTs, likely due to their

181 lower frequency (e.g. Figure 1B). The cut-offs for the core may fail to identify members  
182 of the core microbial community, *i.e.* this method may produce “false negatives”. By  
183 failing to include members in the core (e.g. low abundance taxa that are ubiquitous),  
184 researchers may be underestimating the contribution of the core to ecosystem function.  
185 Data from the mice dataset (Turnbaugh *et al.*, (2009) did not identify a core microbial  
186 community across 100% of samples, or also using the PSM with abundance threshold.  
187 The probabilistic method identified the same three phyla as the arbitrary cutoff method  
188 (*Actinobacteria*, *Bacteroidetes*, and *Firmicutes*), but also recovered an additional eight  
189 phyla (*Cyanobacteria*, *Fusobacteria*, *Lentisphaerae*, *Proteobacteria*, *Synergistetes*,  
190 *Tenericutes*, *TM7*, and *Verrucomicrobia*) as members of the core microbial community  
191 (Figure 2). The authors also indicated the distinct proportions of the *Bacteroidetes* and  
192 *Actinobacteria* phyla associated to obese and lean mice. Both phyla were also detected  
193 by our probabilistic method, with OTUs affiliated with these groups as components of  
194 the core microbial community.

195         Rather than defining a specific, core cutoffs, some researchers have used the  
196 term ‘persistent’ – referring to taxa with a high (but below 100%) occurrence frequency,  
197 or ‘transient’ referring to taxa with low occurrence frequency. For example, Caporaso *et*  
198 *al.*, (2011) have identified a persistent and transient communities, which are classified  
199 as OTUs occurring in 60% or 20% of samples, respectively. Using this dataset  
200 (Caporaso *et al.* 2011), we identified a probable core community, also based on OTUs,  
201 across all of the human site samples made of 8,751 OTUs (Supplementary Figure S10).  
202 The authors identified classes belonging to the phyla *Firmicutes*, *Proteobacteria*,  
203 *Bacteroidetes*, and *Tenericutes* in the human gut. Similar results were obtained by our  
204 approach, with the major affiliation of the OTUs to the phyla *Firmicutes*,  
205 *Proteobacteria*, and *Bacteroidetes* (Supplementary Figure S14). We believe that our



206 approach better succeeds to identify the core community for two reasons. First, our  
207 method identified core communities across assessments previously identified as not  
208 having a core community (as determined by 100% frequency occurrence). Second, our  
209 method offers a complement to other terms as “persistent” and “transient” communities,  
210 e.g. indicating the rare microorganisms that could be classified in persistent group.

211 Same results were observed applying our proposed method to grapevine (leaves,  
212 flowers, grapes, and roots), and the maize rhizosphere. For example, Zarraonaindia *et*  
213 *al.*, (2015) suggested a bacterial core community identified by three OTUs across 75%  
214 of samples from grape (leaves, flowers, grapes, and roots) and soils, over two growing  
215 seasons. These OTUs belonged to the genera *Bradyrhizobium*, *Steroidobacter* and  
216 *Acidobacteria*. By using our proposed method on the same dataset, 5,039 OTUs were  
217 identified as belonging to the core community (Supplementary Figure S12A and S12B).  
218 In addition, members of the *Cyanobacteria* phylum - which was a dominant group  
219 identified by the arbitrary methods (90% of relative abundance; Supplementary Figure  
220 S15) – comprised only a small component of the core microbial community using the  
221 probabilistic method. This variation in dominance could directly affect the conclusions  
222 about microbial composition across the system and may also affect the correlations with  
223 environmental drivers.

224 Here, we demonstrate the use of a probabilistic model to identify the core microbial  
225 communities. By applying a probabilistic model, our results suggest that the core  
226 microbial community may be higher in richness and diversity than previously  
227 demonstrated using other methods. Our method also allowed us to include rare (low  
228 abundance) members in the core microbial community, which would otherwise be a  
229 challenge using an arbitrary core cutoff. The use of a probabilistic model can extend our  
230 detection of the core microbial community, and could potentially help researchers to

231 better connect the core community to ecosystem functions. An increased understanding  
232 of core microbial functions could support more robust studies in several fields, from  
233 human health (Zaura *et al.*, 2009) to increased crop production. The microbial core  
234 community could also be used as an indicator of system perturbations (Shade and  
235 Handelsman, 2012) such as disease occurrence. This new approach could provide future  
236 studies a more realistic strategy to define calculate the core community, and could help  
237 to investigate the role of core microbial community in ecosystem function, or to  
238 elucidate the drivers of its composition. The probabilistic model is a new tool to step  
239 forward in the microbial community investigation. Only with the use of more rigorous  
240 and less arbitrary statistical methods it will be possible to understand the microbial  
241 ecology and its interactions.

## 242 **EXPERIMENTAL PROCEDURES**

243 We selected four datasets composed of microbiomes from human samples  
244 (tongue, gut, and palms), mice (gut), grapevines (plant organs and bulk soil), and the  
245 maize rhizosphere to study the core microbial community identified using arbitrary  
246 cutoffs and a probabilistic method based on the Poisson distribution (Table 1).

247 The mice dataset was used to evaluate how the gut microbiome influences host  
248 adiposity (Turnbaugh *et al.*, 2009). The data are from fecal samples from 154  
249 individuals (mice) divided into adult females, monozygotic or dizygotic twin pairs, and  
250 their mothers. The core microbial community was identified using the *Phylotype*  
251 *Sampling Model* (PSM), which by Poisson distribution estimates the failures to observe  
252 microbial groups possibly belonging to the core community. The authors established a  
253 threshold value for abundance, considering only the OTUs with more than 0,5% of  
254 relative abundance as members of the core microbial community.

255 The human microbiome database consists of 396 samples, collected along a time

256 series of two individuals at four body sites, including gut, tongue, and left and right  
257 palm (Caporaso *et al.*, 2011). In the original study, the authors aimed to evaluate the  
258 temporal variation in the human microbiome. The authors used the terms persistent  
259 (microbial taxa with high levels of occurrence across samples), and transient (taxa with  
260 low levels of occurrence across samples) community, because it identified a very small  
261 temporal core across all samples. The core was defined as the taxa found across 100%  
262 of the samples.

263 In the grapevine database, Zarraonaindia *et al.*, (2015) identify the OTUs shared  
264 across grapevine organs (flower, leaves, grapes, root), the root zone, and bulk soil over  
265 two growing seasons. The authors reduced the cutoff to 75% occurrence across samples  
266 to determine the core community. This decision was justified by the authors due to the  
267 lack of OTUs occurring across all samples.

268 The maize database is the only study included in our dataset that did not attempt  
269 to identify the core community. The authors aimed to determine the impact of genetic  
270 variation on the composition of bacterial communities inhabiting the maize rhizosphere  
271 (Peiffer *et al.*, 2013).

272 The biological observation matrices (BIOM) derived from these data were  
273 obtained from the Earth Microbiome Project (EMP; <http://www.earthmicrobiome.org>),  
274 available on the *Qiita* platform (<https://qiita.ucsd.edu>). We used the BIOM files due to  
275 the similar treatment of data by bioinformatics, including quality filters and assignment  
276 of OTU taxonomy (Elli *et al.*, 2010; Caporaso *et al.*, 2011; Peiffer *et al.*, 2013;  
277 Zarraonaindia *et al.*, 2015). We used the software *QIIME* (Chen and Lifschitz, 1989) to  
278 convert the BIOM files into text files, which were further imported into the *R* software  
279 (Team 2016), where we analyzed it using the packages '*RAM*' (Chen *et al.*, 2016),  
280 '*vegan*' (Oksanen *et al.*, 2016) and '*Hmisc*' (Harrell Jr *et al.*, 2016).

281           The identification of the core microbial community is conventionally obtained by  
282 defining limits of frequency across the samples, *i.e.* a core community could be defined  
283 as microorganisms occurring in all samples (100% of occurrence frequency) or in a part  
284 of the samples (varying from 30% to 90% of frequency). For example, Ainsworth *et al.*,  
285 (2015) identified the ubiquitous endosymbiont bacterial community (or core  
286 community) associated with corals using a 30% occurrence frequency cut-off.  
287 Similarly, the human and grapevine studies were used determined the core community,  
288 respectively at levels of 100%, 100% and 75% occurrence frequency across the  
289 samples. We used a range of limits - 30, 40, 50, 60,70, 80, 90 and 100% occurrence  
290 frequency - based on the OTU tables across the samples to verify the difference in the  
291 core microbial community selected by these methods.

292           The method proposed here is based on the probability test for the distribution of  
293 each microbial taxon (OTU) among samples. This probability test is based on the  
294 Poisson distribution, which is a discrete random probability regression model. The  
295 Poisson distribution expresses the probability of an event taking place at a given point  
296 in time (Rao and Rubin, 1964). Here we treat events as OTUs across a series of  
297 collected samples. The Poisson distribution has previously been used in biogeographic  
298 studies to predict the abundance of species in a given ecosystem (Vincent and Haworth,  
299 1983; Guisan and Zimmermann, 2000).

300           Following the idea proposed in the Phylotype Sampling Model (Turnbaugh *et*  
301 *al.*, 2009), the Poisson distribution was used to verify the sampling error expected given  
302 the sample size and the probability of observing the minimum abundance of a  
303 microorganism in any sample. However, the major difference from the previously  
304 methods including the Phylotype Sampling Model is that our proposed method does not  
305 present abundance or frequency thresholds. The probability (***P***) of Poisson distribution

306 is obtained by  $P(x) = \lambda^x e^{-\lambda}/x!$ , where the lambda ( $\lambda$ ) and  $x$  represent the average of  
307 relative abundance and the occurrence frequency of each taxon across the communities,  
308 respectively. Using this formula, we have tested two hypotheses:  $H_0$  – the individual  
309 (OTU) fits in the Poisson distribution and thus likely occurs in every sample (95% of  
310 confidence), indicating that it cannot be excluded from the core microbial community;  
311  $H_1$  – the individual does not fit in the Poisson distribution, and thus is unlikely to occur  
312 in every sample, supporting its exclusion from the core microbial community.

313 The calculation starts with the determination of the average of sequences per  
314 community source ( $N$ ), the average relative abundance of each taxon across  
315 communities ( $p$ ) and the occurrence frequency of each taxon across communities ( $f$ ).  
316 The  $p$  and  $f$  are calculated with values of  $A$  and  $rich > 0$ , and they are used in the  
317 Poisson distribution, where the  $\lambda$  is obtained per OTU by the formula  $\lambda = N \times p$ .

318 The goodness-of-fit of the Poisson model to distribution of OTUs were  
319 determined from the  $R^2$  (adjusted) and  $p$ -value. The goodness of fit ( $R^2$ ) indicates the  
320 level of variance of an OTU's relative abundance explained by the Poisson distribution,  
321 which in this case is correlated with the proportion of microbial community that could  
322 be not excluded as possible member of the core microbial group. The  $p$ -value is used to  
323 calculate the significance of OTUs predicted as probable core members by the Poisson  
324 distribution.

325 The arbitrary (thresholds of 30, 40, 50, 60, 70, 80, 90 and 100%) and the  
326 proposed (Poisson distribution) methods resulted in OTU tables for the core microbial  
327 community and the “variable” community (made of those that do not belong to the core  
328 community). The statistical analyses comparing the results were performed using the R  
329 software version 3.2.2 (R Core Team, 2015), including the Shannon index. We also  
330 developed a function in R, which identifies a core microbial community by the method

331 based on the Poisson distribution. The R script of this function is available in  
332 Supplementary Code Simplified file, and the description is available in Supplementary  
333 Code Description file.

334

### 335 ACKNOWLEDGEMENTS

336 We thank FAPESP for the projects funding, 2014/22845-5 and 2013/18529-8. We are  
337 grateful to the students in Brendan J.M. Bohannan's laboratory and the students from the  
338 Institute of Ecology and Evolution for support. We thank the members of the Earth Microbiome  
339 Project and the authors that made the database available. We also acknowledge the comments  
340 and discussion provided by Annelise Mendes Nascimento, Clarisse Betancourt, Ademir Durrer,  
341 and Trish Pasby throughout the manuscript preparation.

342

### 343 References

- 344 Ainsworth, T.D., Krause, L., Bridge, T., Torda, G., Raina, J.-B., Zakrzewski, M., et al.  
345 (2015) The coral core microbiome identifies rare bacterial taxa as ubiquitous  
346 endosymbionts. *ISME J.* **9**: 2261–2274.
- 347 Caporaso, J.G., Lauber, C.L., Costello, E.K., Berg-Lyons, D., Gonzalez, A.,  
348 Stombaugh, J., et al. (2011) Moving pictures of the human microbiome. *Genome*  
349 *Biol.* **12**: R50.
- 350 Chen, H.M. and Lifschitz, C.H. (1989) Preparation of fecal samples for assay of volatile  
351 fatty acids by gas-liquid chromatography and high-performance liquid  
352 chromatography. *Clin. Chem.* **35**: 74–76.
- 353 Chen, W., Simpson, J., and Levesque, C.A. (2016) RAM: R for Amplicon-Sequencing-  
354 Based Microbial-Ecology.
- 355 Elli, M., Colombo, O., and Tagliabue, a. (2010) A common core microbiota between  
356 obese individuals and their lean relatives? Evaluation of the predisposition to  
357 obesity on the basis of the fecal microflora profile. *Med. Hypotheses* **75**: 350–352.
- 358 Feinstein, L.M., Woo, J.S., Blackwood, C.B., Sul, W.J., Blackwood, C.B., Woo, J.S., et  
359 al. (2009) Assessment of bias associated with incomplete extraction of microbial  
360 DNA from soil. *Appl. Environ. Microbiol.* **75**: 5428–5433.
- 361 Guisan, A. and Zimmermann, N.E. (2000) Predictive habitat distribution models in  
362 ecology. *Ecol. Modell.* **135**: 147–186.
- 363 Hamady, M. and Knight, R. (2009) Microbial community profiling for human  
364 microbiome projects: Tools, techniques, and challenges. *Genome Res.* **19**: 1141–  
365 1152.
- 366 Harrell Jr, F.E., with contributions from Charles Dupont, and many others. (2016)

- 367 Hmisc: Harrell Miscellaneous.
- 368 Henderson, G., Cox, F., Ganesh, S., Jonker, A., Young, W., Abecia, L., et al. (2015)  
369 Rumen microbial community composition varies with diet and host, but a core  
370 microbiome is found across a wide geographical range. *Sci. Rep.* **5**: 14567.
- 371 Kanagawa, T. (2003) Bias and artifacts in multitemplate polymerase chain reactions  
372 (PCR). *J. Biosci. Bioeng.* **96**: 317–323.
- 373 Karlis, D. (2003) An EM algorithm for multivariate Poisson distribution and related  
374 models. *J. Appl. Stat.* **30**: 63–77.
- 375 Li, K., Bihan, M., and Methé, B.A. (2013) Analyses of the stability and core taxonomic  
376 memberships of the human microbiome. *PLoS One* **8**: e63139.
- 377 Lladser, M.E., Gouet, R., and Reeder, J. (2011) Extrapolation of urn models via  
378 Poissonization: Accurate measurements of the microbial unknown. *PLoS One* **6**:  
379 e21105.
- 380 Lundberg, D.S., Lebeis, S.L., Paredes, S.H., Yourstone, S., Gehring, J., Malfatti, S., et  
381 al. (2012) Defining the core *Arabidopsis thaliana* root microbiome. *Nature* **488**:  
382 86–90.
- 383 McMurdie, P.J. and Holmes, S. (2014) Waste Not, Want Not: Why Rarefying  
384 Microbiome Data Is Inadmissible. *PLoS Comput. Biol.* **10**: e1003531.
- 385 Oksanen, J., Blanchet, F.G., Kindt, R., Legendre, P., Minchin, P.R., O’Hara, R.B., et al.  
386 (2016) Vegan: Community Ecology Package.
- 387 Pédrón, T., Mulet, C., Dauga, C., Frangeul, L., Chervaux, C., Grompone, G., and  
388 Sansonettia, P.J. (2012) A crypt-specific core microbiota resides in the mouse  
389 colon. *MBio* **3**: 1–7.
- 390 Pedrós-Alió, C. (2006) Marine microbial diversity: can it be determined? *Trends*  
391 *Microbiol.* **14**: 257–263.
- 392 Peiffer, J.A., Spor, A., Koren, O., Jin, Z., Tringe, S.G., Dangl, J.L., et al. (2013)  
393 Diversity and heritability of the maize rhizosphere microbiome under field  
394 conditions. *Proc. Natl. Acad. Sci.* **110**: 6548–6553.
- 395 Prosser, J.I. (2015) Dispersing misconceptions and identifying opportunities for the use  
396 of “omics” in soil microbial ecology. *Nat. Rev.* **13**: 439.
- 397 R Core Team (2015) R: A Language and Environment for Statistical Computing.
- 398 Rao, C.R. and Rubin, H. (1964) On a characterization of the poisson distribution. *Indian*  
399 *J. Stat.* **26**: 295–298.
- 400 Roeselers, G., Mittge, E.K., Stephens, W.Z., Parichy, D.M., Cavanaugh, C.M.,  
401 Guillemin, K., and Rawls, J.F. (2011) Evidence for a core gut microbiota in the  
402 zebrafish. *ISME J.* **5**: 1595–608.
- 403 Saunders, A.M., Albertsen, M., Vollesen, J., and Nielsen, P.H. (2015) The activated  
404 sludge ecosystem contains a core community of abundant organisms. *ISME J.* **10**:  
405 11–20.
- 406 Schlaeppli, K., Dombrowski, N., Oter, R.G., Ver Loren van Themaat, E., and Schulze-  
407 Lefert, P. (2014) Quantitative divergence of the bacterial root microbiota in  
408 *Arabidopsis thaliana* relatives. *Proc. Natl. Acad. Sci. U. S. A.* **111**: 585–92.



- 409 Sekelja, M., Berget, I., Næs, T., and Rudi, K. (2011) Unveiling an abundant core  
410 microbiota in the human adult colon by a phylogroup-independent searching  
411 approach. *ISME J.* **5**: 519–531.
- 412 Shade, A. and Gilbert, J.A. (2015) Temporal patterns of rarity provide a more complete  
413 view of microbial diversity. *Trends Microbiol.* **23**: 335–340.
- 414 Shade, A. and Handelsman, J. (2012) Beyond the Venn diagram: The hunt for a core  
415 microbiome. *Environ. Microbiol.* **14**: 4–12.
- 416 Shade, A., Jones, S.E., Caporaso, J.G., Handelsman, J., Knight, R., Fierer, N., and  
417 Gilbert, J.A. (2014) Conditionally Rare Taxa Disproportionately Contribute to  
418 Temporal Changes in Microbial Diversity. *MBio* **5**: e01371-14.
- 419 Sogin, M.L., Morrison, H.G., Huber, J.A., Welch, D.M., Huse, S.M., Neal, P.R., et al.  
420 (2006) Microbial diversity in the deep sea and the underexplored “rare biosphere.”  
421 *Proc. Natl. Acad. Sci.* **103**: 12115–12120.
- 422 Turnbaugh, P.J., Hamady, M., Yatsunencko, T., Cantarel, B.L., Duncan, A., Ley, R.E., et  
423 al. (2009) A core gut microbiome in obese and lean twins. *Nature* **457**: 480–484.
- 424 Turnbaugh, P.J., Ley, R.E., Hamady, M., Fraser-Liggett, C.M., Knight, R., and Gordon,  
425 J.I. (2007) The Human Microbiome Project. *Nature* **449**: 804–810.
- 426 Vincent, P.J. and Haworth, J.M. (1983) Poisson regression models of species  
427 abundance. *J. Biogeogr.* **10**: 153–160.
- 428 Weiss, S., Xu, Z.Z., Peddada, S., Amir, A., Bittinger, K., Gonzalez, A., et al. (2017)  
429 Normalization and microbial differential abundance strategies depend upon data  
430 characteristics. *Microbiome* **5**: 27.
- 431 Yeoh, Y.K., Paungfoo-Lonhienne, C., Dennis, P.G., Robinson, N., Ragan, M.A.,  
432 Schmidt, S., and Hugenholtz, P. (2015) The core root microbiome of sugarcane  
433 cultivated under varying nitrogen fertiliser application. *Environ. Microbiol.* **18**:  
434 1338–1351.
- 435 Zarraonaindia, I., Owens, S.M., Weisenhorn, P., West, K., Hampton-Marcell, J., Lax,  
436 S., et al. (2015) The Soil microbiome influences grapevine-associated microbiota.  
437 *MBio* **6**: e02527-14.
- 438 Zaura, E., Keijsers, B.J.F., Huse, S.M., and Crielaard, W. (2009) Defining the healthy  
439 “core microbiome” of oral microbial communities. *BMC Microbiol.* **9**: 259.
- 440



441 **Table legends**

442 **Table 1** – Databases selected from EMP on the *Qiita platform*.

443

444 **Table 2** – Number of OTU's identified by the arbitrary and proposed method (based on

445 the Poisson distribution) across the datasets

446

447

448 **Figure legends**

449 **Figure 1** – The core and variable communities of the mice microbiome

450 determined by (A) our proposed method based on the Poisson distribution and (B) an

451 arbitrary, threshold-based method.

452 **Figure 2** – Percentage of the relative abundance of the core communities of the

453 mice database determined by arbitrary methods (thresholds of 30,40,50,60,70,80,90 and

454 100%) and by our proposed method (Core Poisson).

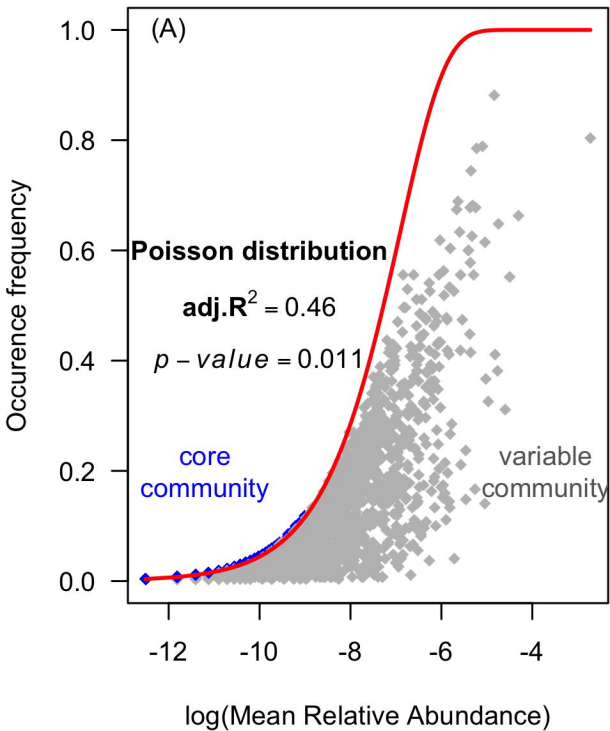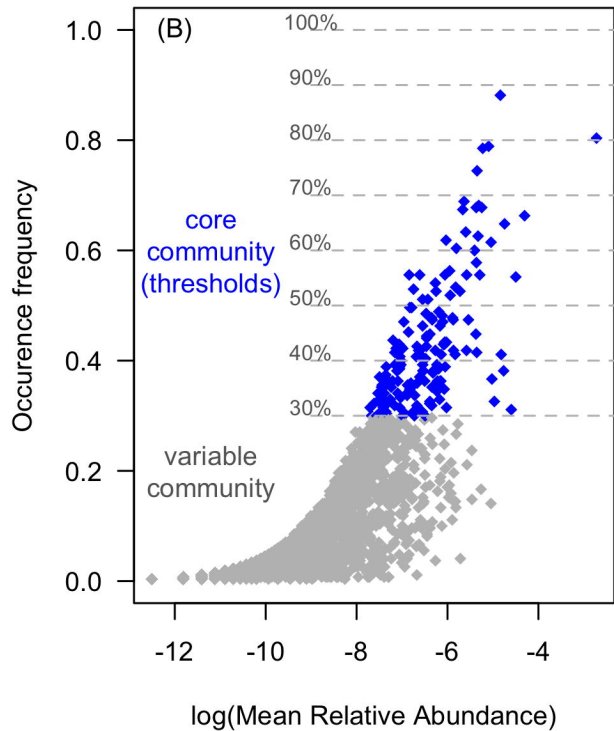

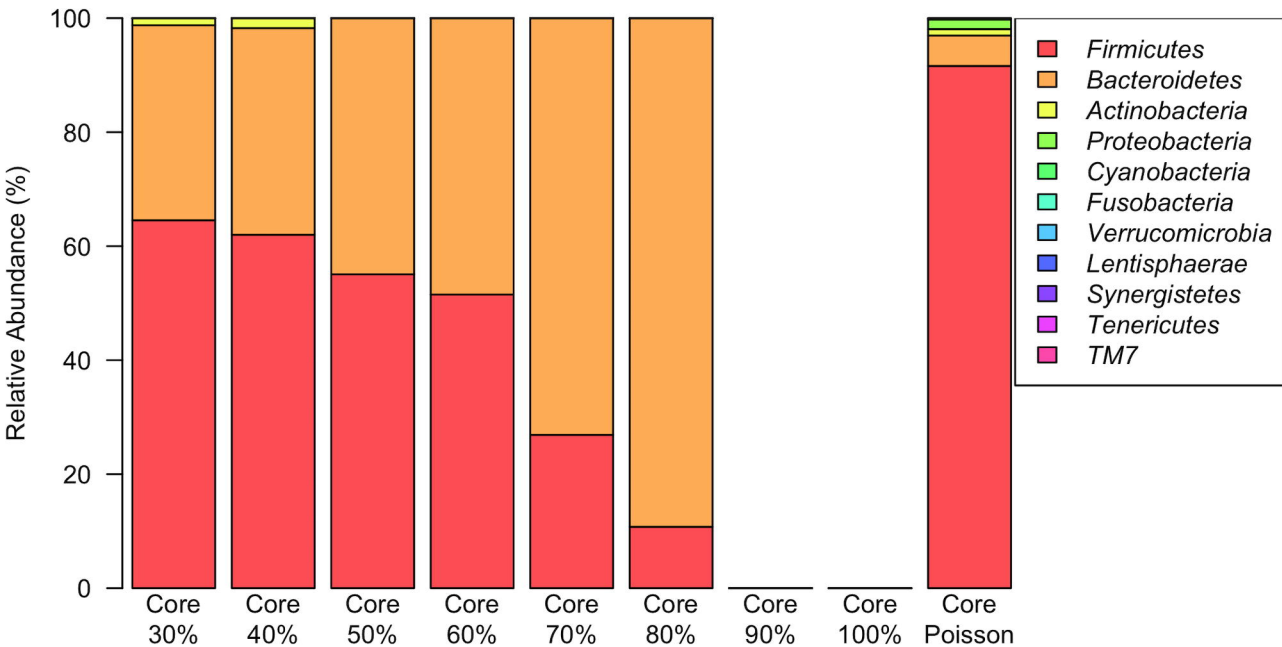

Table 1 – Databases selected from EMP on Qiita platform

|                                 | Databases selected from EMP                                                                               |                                                                                                           |                                                                                                         |                                                                                                       |
|---------------------------------|-----------------------------------------------------------------------------------------------------------|-----------------------------------------------------------------------------------------------------------|---------------------------------------------------------------------------------------------------------|-------------------------------------------------------------------------------------------------------|
|                                 | Grape                                                                                                     | Maize                                                                                                     | Human                                                                                                   | Mice                                                                                                  |
| <b>Study EMP – ID</b>           | 2382                                                                                                      | 1792                                                                                                      | 550                                                                                                     | 77                                                                                                    |
| <b>Qiita Link</b>               | <a href="https://qiita.ucsd.edu/study/description/2382">https://qiita.ucsd.edu/study/description/2382</a> | <a href="https://qiita.ucsd.edu/study/description/1792">https://qiita.ucsd.edu/study/description/1792</a> | <a href="https://qiita.ucsd.edu/study/description/550">https://qiita.ucsd.edu/study/description/550</a> | <a href="https://qiita.ucsd.edu/study/description/77">https://qiita.ucsd.edu/study/description/77</a> |
| <b>Title</b>                    | The Soil Microbiome Influences Grapevine-Associated Microbiota                                            | Diversity and heritability of the maize rhizosphere microbiome under field conditions                     | Moving pictures of the human microbiome                                                                 | A core gut microbiome in obese and lean twins                                                         |
| <b>Number of samples</b>        | 401                                                                                                       | 442                                                                                                       | 1,736                                                                                                   | 271                                                                                                   |
| <b>Data Type</b>                | 16S - HiSeq                                                                                               | 16S – 454 FLX                                                                                             | 16S – 454 FLX                                                                                           | 16S – 454 FLX                                                                                         |
| <b>Number of reads / sample</b> | 1,000                                                                                                     | 2,080                                                                                                     | 5,000                                                                                                   | 1,000                                                                                                 |
| <b>OTUs</b>                     | 8,583                                                                                                     | 10,747                                                                                                    | 16,129                                                                                                  | 4,495                                                                                                 |
| <b>Reference</b>                | (Zarraonaindia <i>et al.</i> , 2015)                                                                      | (Peiffer <i>et al.</i> , 2013)                                                                            | (Caporaso <i>et al.</i> , 2011)                                                                         | (Turnbaugh <i>et al.</i> , 2009)                                                                      |

Table 2 – Number of OTU's identified by the arbitrary and proposed method (based on the Poisson distribution) across the datasets

| Methods             |      | Databases      |                    |                |                    |                |                    |                |                    |
|---------------------|------|----------------|--------------------|----------------|--------------------|----------------|--------------------|----------------|--------------------|
|                     |      | Grapevine      |                    | Maize          |                    | Human          |                    | Mice           |                    |
|                     |      | Core community | Variable community | Core community | Variable community | Core community | Variable community | Core community | Variable community |
| Conventional method | 30%  | 211            | 8,372              | 272            | 10,475             | 206            | 15,923             | 170            | 4,325              |
|                     | 40%  | 109            | 8,474              | 145            | 10,602             | 93             | 16,036             | 82             | 4,413              |
|                     | 50%  | 40             | 8,543              | 80             | 10,667             | 42             | 16,087             | 35             | 4,460              |
|                     | 60%  | 15             | 8,568              | 39             | 10,708             | 24             | 16,105             | 19             | 4,476              |
|                     | 70%  | 5              | 8,578              | 19             | 10,728             | 12             | 16,117             | 5              | 4,490              |
|                     | 80%  | 0              | 8,583              | 5              | 10,742             | 2              | 16,127             | 2              | 4,493              |
|                     | 90%  | 0              | 8,583              | 3              | 10,744             | 0              | 16,129             | 0              | 4,495              |
|                     | 100% | 0              | 8,583              | 0              | 10,747             | 0              | 16,129             | 0              | 4,495              |
| Proposed method     |      | 5,039          | 3,544              | 5,294          | 5,453              | 8,751          | 7,378              | 1,717          | 2,778              |
